# Supplementary material
Source: PubMed Central journal article supplement (PMC2604965)
Supplement: 0809264105_0809264105SI.pdf [file 0809264105_0809264105SI.pdf]

# Supporting Information

Pondeville et al. 10.1073/pnas.0809264105

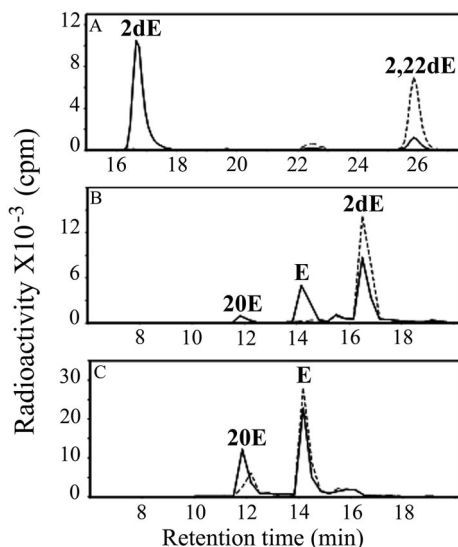

**Fig. S1.** Catalytic activities of AgCYP302A1, AgCYP315A1, and AgCYP314A1. Cell transfection and incubation with radiolabeled substrates and chromatographic analyses. Schneider *Drosophila* SL2 cell line was maintained at 22 °C in Schneider medium supplemented with 10% heat-inactivated FCS and antibiotics (100  $\mu\text{g}/\text{ml}$  streptomycin and 60  $\mu\text{g}/\text{ml}$  penicillin). Dimethyl dioctadecyl ammonium bromide (96  $\mu\text{g}/\text{plate}$ ) was used for transient transfection in 75  $\text{cm}^2$  culture plates. Cells ( $2.2 \times 10^7/\text{well}$ ) were transfected with 5.5  $\mu\text{g}$  pCaSpeR-actin-AgCYP302A1, pBV5-AgCYP315A1, pBV5-AgCYP314A1, or pCaSpeR-actin-GFP (negative control for metabolism experiments) in 11 ml medium with serum and antibiotics. Transfected cells were first incubated for 3 days at 22 °C to allow protein expression and further incubated for 2 days with 0.2  $\mu\text{Ci}$  radiolabeled [22,23- $^3\text{H}_2$ ]2,22dE (specific activity of  $\approx 20$  Ci/mmol) for testing CYP302A1 activity, with 0.1  $\mu\text{Ci}$  [23,24- $^3\text{H}_4$ ]2dE (specific activity of  $\approx 25$  Ci/mmol) for CYP315A1 and with 0.2  $\mu\text{Ci}$  [23,24- $^3\text{H}_4$ ]E (specific activity of 90 Ci/mmol) for CYP314A1. [ $^3\text{H}$ ]2,22dE and [ $^3\text{H}$ ]2dE were gifts from C. Hétru and J. Hoffmann (Strasbourg, France), and tritiated E was purchased from Perkin-Elmer. After incubation, media plus cells were stored at  $-20$  °C. To analyze the conversion by transfected cells, radiolabeled ecdysteroids were extracted from incubation media and cells by  $\text{C}_{18}$ -Sep Pak cartridges and eluted in methanol. Reference unlabeled ecdysteroids (1  $\mu\text{g}$ ) were added and samples were dried. After re-suspension in methanol:water:TFA (500:499:1, vol/vol/v), samples were further analyzed by RP-HPLC using a  $\text{C}_{18}$  column (Spherisorb 50DS2,  $250 \times 4.6$  mm) and eluted using a step-gradient of solvent B (acetonitrile:isopropanol, 5:2, vol/vol) in A (0.1% TFA in water): 0 to 2 min from 15% to 25%, 2 to 8 min at 25%, and 8 to 28 min from 25% to 75% for experiments with [ $^3\text{H}$ ]2,22dE; 0 to 6 min at 18% and 6 to 28 min from 18% to 100% for experiments with [ $^3\text{H}$ ]2dE or [ $^3\text{H}$ ]E. Conversion of radiolabeled substrates by transfected cells analyzed by RP-HPLC is depicted. (A) CYP302A1-transfected cells hydroxylated 2,22-dideoxyecdysone (2,22dE) almost exclusively into 2-deoxyecdysone (2dE; solid line, 76.6% of total radioactivity), whereas only a background activity was observed in control cells (dotted line, 2% conversion). (B) Cells transfected with CYP315A1 converted 2dE mainly into E (30.1% of total radioactivity) whereas control cells did not significantly convert 2dE into E (3.3%) or 20E (0.6%). A limited further conversion into 20E (5.2% of total radioactivity) was also observed in CYP315A1-transfected cells, which likely corresponds to the endogenous capacity of the SL2 cells to metabolize E into 20E (dotted line, C). (C) CYP314A1-transfected cells metabolized E into 20E (29% of total radioactivity) at a higher rate than the control SL2 cells (15.2% of total radioactivity). Solid line, cells transfected with a candidate gene; dotted line, control cells transfected with GFP. Only relevant fractions are presented.

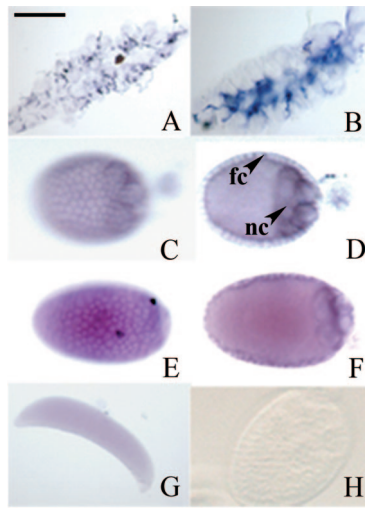

**Fig. S2.** *In situ* expression pattern of *CYP302A1* in the ovary during the first gonotrophic cycle. (A) Ovary from a non-blood-fed female; the ovary is composed of multiple synchronous ovarioles. (Scale bar, 250  $\mu\text{m}$ .) (B) Ovary at 6 h PBM. (Scale bar, 250  $\mu\text{m}$ .) (C and D) Ovariole at 18 h PBM. (Scale bar, 60  $\mu\text{m}$ .) (E and F) Ovariole at 24 h PBM. (Scale bar, 60  $\mu\text{m}$ .) (G) Ovariole at 48 h PBM. (Scale bar, 80  $\mu\text{m}$ .) (H) Ovariole at 24 h PBM hybridized with a control sense probe. In ovaries, *CYP302A1* was not detected in the ovarian follicles before the blood meal (A) and at 6 h PBM (B), but a slight labeling was observed in the germarium, and this may explain the signal observed with RT-PCR. At 18 and 24 h PBM, *CYP302A1* was strongly detected in follicular (C and E) and nurse (D and F) cells of primary follicles. At 48 h PBM (G), only a weak signal was observed in the vitellogenic follicles. The sense probe was used as a negative control and gave no signal, as shown for a 24 h PBM ovary (H). See main article text for *Materials and Methods*.

**Table S1. Specific primers used for cloning and RT-PCR experiments**

Primers for gene cloning

*CYP306A1*up1 5'-TTCAAGTAAAGTACAAGGAGAG-3'

*CYP302A1*up1 5'-CGCTCTACTTTTCTTTCAATA-3'

*CYP315A1*up1 5'-CGAAGCGGAGTGCGTTGTT-3'

*CYP314A1*up1 5'-TGACCACCCAGTACTACTCT-3'

Primers for RT-PCR experiments

*CYP306A1*up2 5'-GTTACTGGAGCGGATTATT-3'

*CYP302A1*up2 5'-CATCCTGCCACCGACCA-3'

*CYP315A1*up1 (see above)

*CYP314A1*up2 5'-GTTCCGGTGTGACCAATCTGA-3'

*L17*up 5'-TTCCGCATCTCGCTTGGTCT-3'

*CYP306A1*do1 5'-CGTTTTTAACAGTTTTATTATTA-3'

*CYP302A1*do1 5'-TTATGAAGTTCTCGCCTTC-3';

*CYP315A1*do1 5'-CTAGTCCTGCATTTGTGCCA-3';

*CYP314A1*do1 5'-GCATCACCCGCTTCCTAATA-3'

*CYP306A1*do2 5'-GCTCTCGCCCAAACACATA-3'

*CYP302A1*do2 5'-CCAAACGGAAGCACCAGGT-3'

*CYP315A1*do2 5'-CGTCTGTGCGTTTGCTATTC-3'

*CYP314A1*do1 (see above)

*L17*do 5'-CCTTCATTTGCGCCTTGTTG-3'
